# Supplementary material
Source: Springer Nature journal article supplement (https://www.springermedizin.de/resource/supplementary/12990_2009_257_MOESM2_ESM.pdf/9612900)
Supplement: MOESM2 [file 9612900]

Neu N /CK1 $\epsilon$ GFAP /CK1 $\epsilon$ Iba 1 /CK1 $\epsilon$ Sham  
(C57BL/6J)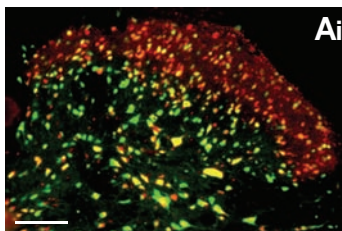

Ai

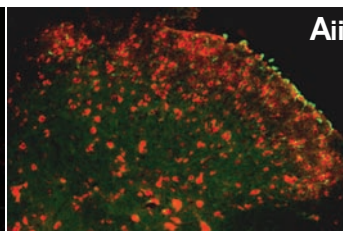

Aii

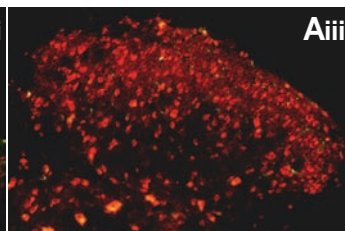

Aiii

SNL  
(C57BL/6J)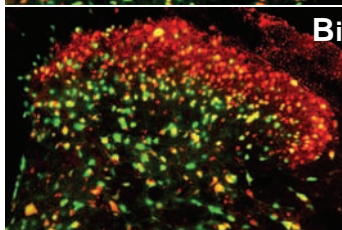

Bi

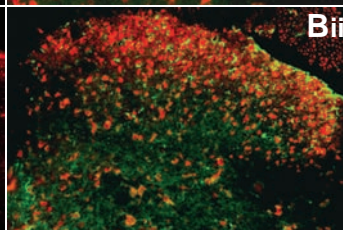

Bii

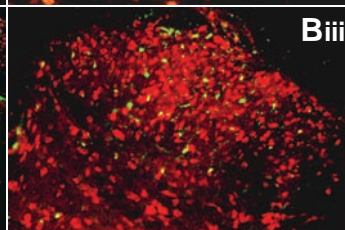

Biii

SNL  
(Ca $_v$ 2.2 $^{-/-}$  mutant)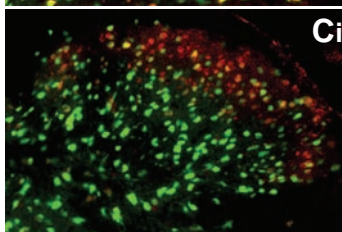

Ci

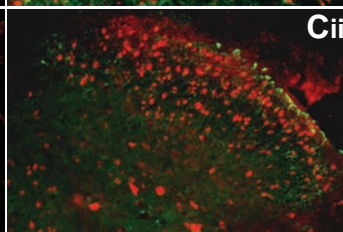

Cii

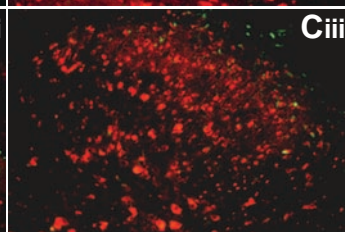

Ciii

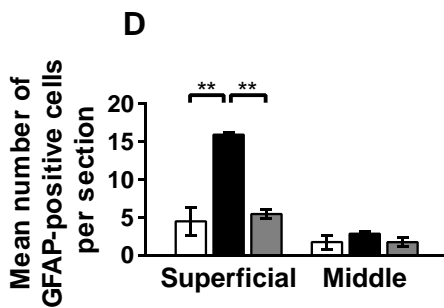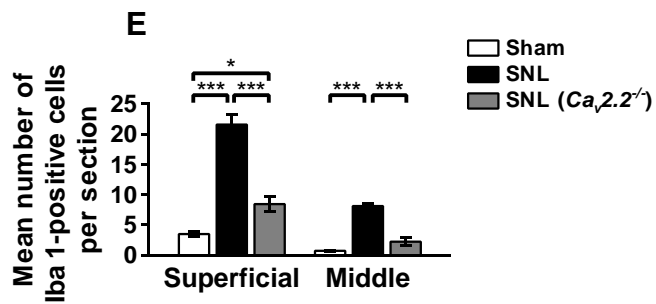

□ Sham  
 ■ SNL  
 ▒ SNL (Ca $_v$ 2.2 $^{-/-}$ )
